# Supplementary material for: Using Geospatial Analysis to Identify Priority Communities for Cervical Cancer Prevention in Texas
Source: PubMed Central journal article supplement — AJPM Focus. 2024 Jun 6;3(4):100247. doi: 10.1016/j.focus.2024.100247 (PMC11260362; doi:10.1016/j.focus.2024.100247), 2024-06-06
Supplement: mmc1.pdf [file mmc1.pdf]

Using geospatial analysis to identify priority communities for cervical cancer prevention in Texas.

Itunu O. Sokale MD, DrPH;<sup>1,2</sup> Aaron P. Thrift, PhD;<sup>1,2</sup> Jane R. Montealegre, PhD;<sup>3</sup> Onyema G. Chido-Amajuoyi, MD, MPH;<sup>4</sup> Victor T. Adekanmbi, MD, PhD;<sup>5</sup> Abiodun O. Oluyomi, PhD<sup>1,2</sup>

**Appendix Table**

**Appendix Table 1.** Hot spots of cervical cancer incidence in Texas, 2014-2018<sup>a,b</sup>

| Hot Spot Cluster      | County       | No. of census tracts per county within hot spot (%) | Total no. of census tracts in the county |
|-----------------------|--------------|-----------------------------------------------------|------------------------------------------|
| <b>1</b><br>(RR=1.42) | Aransas      | 6 (100)                                             | 6                                        |
|                       | Atascosa     | 8 (100)                                             | 8                                        |
|                       | Bee          | 7 (100)                                             | 7                                        |
|                       | Bexar        | 144 (39)                                            | 366                                      |
|                       | Brazoria     | 2 (4)                                               | 51                                       |
|                       | Brooks       | 2 (100)                                             | 2                                        |
|                       | Calhoun      | 6 (100)                                             | 6                                        |
|                       | Cameron      | 87 (100)                                            | 87                                       |
|                       | DeWitt       | 5 (100)                                             | 5                                        |
|                       | Dimmit       | 2 (100)                                             | 2                                        |
|                       | Duval        | 3 (100)                                             | 3                                        |
|                       | Frio         | 3 (100)                                             | 3                                        |
|                       | Goliad       | 2 (100)                                             | 2                                        |
|                       | Gonzales     | 5 (83)                                              | 6                                        |
|                       | Guadalupe    | 4 (14)                                              | 29                                       |
|                       | Hidalgo      | 113 (100)                                           | 113                                      |
|                       | Jackson      | 3 (100)                                             | 3                                        |
|                       | Jim Hogg     | 2 (100)                                             | 2                                        |
|                       | Jim Wells    | 7 (100)                                             | 7                                        |
|                       | Karnes       | 4 (100)                                             | 4                                        |
|                       | Kenedy       | 2 (100)                                             | 2                                        |
|                       | Kleberg      | 6 (100)                                             | 6                                        |
|                       | La Salle     | 1 (100)                                             | 1                                        |
|                       | Lavaca       | 5 (83)                                              | 6                                        |
|                       | Live Oak     | 4 (100)                                             | 4                                        |
|                       | Matagorda    | 11 (100)                                            | 11                                       |
|                       | McMullen     | 1 (100)                                             | 1                                        |
|                       | Medina       | 5 (63)                                              | 8                                        |
|                       | Nueces       | 82 (100)                                            | 82                                       |
|                       | Refugio      | 2 (100)                                             | 2                                        |
|                       | San Patricio | 16 (100)                                            | 16                                       |
|                       | Starr        | 15 (100)                                            | 15                                       |
|                       | Victoria     | 23 (100)                                            | 23                                       |
|                       | Webb         | 61 (100)                                            | 61                                       |
| Wharton               | 5 (45)       | 11                                                  |                                          |
| Willacy               | 6 (100)      | 6                                                   |                                          |
| Wilson                | 11 (100)     | 11                                                  |                                          |
| Zapata                | 3 (100)      | 3                                                   |                                          |
| Zavala                | 3 (75)       | 4                                                   |                                          |

**Appendix Table 1** (continued). Hot spots of cervical cancer incidence in Texas, 2014-2018<sup>a,b</sup>

| Hot Spot Cluster      | County    | No. of census tracts per county within hot spot (%) | Total no. of census tracts in the county |
|-----------------------|-----------|-----------------------------------------------------|------------------------------------------|
| <b>2</b><br>(RR=1.38) | Brazoria  | 3 (6)                                               | 51                                       |
|                       | Harris    | 458 (58)                                            | 786                                      |
| <b>3</b><br>(RR=1.81) | Dallas    | 75 (14)                                             | 529                                      |
|                       | Ellis     | 1 (3)                                               | 31                                       |
| <b>4</b><br>(RR=3.73) | Harris    | 6 (1)                                               | 786                                      |
| <b>5</b><br>(RR=1.37) | Archer    | 3 (100)                                             | 3                                        |
|                       | Baylor    | 1 (100)                                             | 1                                        |
|                       | Borden    | 1 (100)                                             | 1                                        |
|                       | Briscoe   | 1 (100)                                             | 1                                        |
|                       | Brown     | 12 (100)                                            | 12                                       |
|                       | Callahan  | 3 (100)                                             | 3                                        |
|                       | Childress | 2 (100)                                             | 2                                        |
|                       | Clay      | 3 (100)                                             | 3                                        |
|                       | Coke      | 2 (100)                                             | 2                                        |
|                       | Coleman   | 3 (100)                                             | 3                                        |
|                       | Comanche  | 4 (100)                                             | 4                                        |
|                       | Concho    | 1 (100)                                             | 1                                        |
|                       | Cottle    | 1 (100)                                             | 1                                        |
|                       | Crosby    | 3 (100)                                             | 3                                        |
|                       | Dawson    | 4 (100)                                             | 4                                        |
|                       | Eastland  | 5 (100)                                             | 5                                        |
|                       | Erath     | 8 (100)                                             | 8                                        |
|                       | Fisher    | 2 (100)                                             | 2                                        |
|                       | Floyd     | 2 (100)                                             | 2                                        |
|                       | Foard     | 1 (100)                                             | 1                                        |
|                       | Garza     | 1 (100)                                             | 1                                        |
|                       | Glasscock | 1 (100)                                             | 1                                        |
|                       | Hale      | 5 (56)                                              | 9                                        |
|                       | Hall      | 1 (100)                                             | 1                                        |
|                       | Hardeman  | 1 (100)                                             | 1                                        |
|                       | Haskell   | 2 (100)                                             | 2                                        |
|                       | Hockley   | 1 (14)                                              | 7                                        |
|                       | Hood      | 3 (30)                                              | 10                                       |
|                       | Howard    | 10 (100)                                            | 10                                       |
|                       | Irion     | 1 (100)                                             | 1                                        |
|                       | Jack      | 3 (100)                                             | 3                                        |
|                       | Jones     | 6 (100)                                             | 6                                        |
|                       | Kent      | 1 (100)                                             | 1                                        |
|                       | King      | 1 (100)                                             | 1                                        |
| Knox                  | 2 (100)   | 2                                                   |                                          |
| Lubbock               | 68 (100)  | 68                                                  |                                          |
| Lynn                  | 3 (100)   | 3                                                   |                                          |
| Martin                | 2 (100)   | 2                                                   |                                          |
| McCulloch             | 3 (100)   | 3                                                   |                                          |
| Midland               | 20 (100)  | 27                                                  |                                          |
| Mills                 | 2 (100)   | 2                                                   |                                          |
| Mitchell              | 2 (100)   | 2                                                   |                                          |
| Motley                | 1 (100)   | 1                                                   |                                          |
| Nolan                 | 5 (100)   | 5                                                   |                                          |
| Palo Pinto            | 9 (100)   | 9                                                   |                                          |

**Appendix Table 1** (continued). Hot spots of cervical cancer incidence in Texas, 2014-2018<sup>a,b</sup>

| Hot Spot Cluster | County        | No. of census tracts per county within hot spot (%) | Total no. of census tracts in the county |
|------------------|---------------|-----------------------------------------------------|------------------------------------------|
| 5<br>(RR=1.37)   | Parker        | 7 (37)                                              | 19                                       |
|                  | Reagan        | 1 (100)                                             | 1                                        |
|                  | Runnels       | 4 (100)                                             | 4                                        |
|                  | Scurry        | 4 (100)                                             | 4                                        |
|                  | Shackelford   | 1 (100)                                             | 1                                        |
|                  | Stephens      | 3 (100)                                             | 3                                        |
|                  | Sterling      | 1 (100)                                             | 1                                        |
|                  | Stonewall     | 1 (100)                                             | 1                                        |
|                  | Taylor        | 38 (100)                                            | 38                                       |
|                  | Terry         | 3 (100)                                             | 3                                        |
|                  | Throckmorton  | 1 (100)                                             | 1                                        |
|                  | Tom Green     | 25 (100)                                            | 25                                       |
|                  | Wichita       | 37 (17)                                             | 218                                      |
|                  | Wilbarger     | 4 (100)                                             | 4                                        |
|                  | Wise          | 1 (9)                                               | 11                                       |
| Young            | 4 (100)       | 4                                                   |                                          |
| 6<br>(RR=2.11)   | Tarrant       | 42 (12)                                             | 357                                      |
| 7<br>(RR=1.51)   | Anderson      | 5 (45)                                              | 11                                       |
|                  | Angelina      | 17 (100)                                            | 17                                       |
|                  | Cherokee      | 11 (92)                                             | 12                                       |
|                  | Hardin        | 8 (73)                                              | 11                                       |
|                  | Houston       | 7 (100)                                             | 7                                        |
|                  | Jasper        | 8 (100)                                             | 8                                        |
|                  | Leon          | 1 (33)                                              | 3                                        |
|                  | Liberty       | 6 (43)                                              | 14                                       |
|                  | Madison       | 2 (50)                                              | 4                                        |
|                  | Montgomery    | 6 (10)                                              | 59                                       |
|                  | Nacogdoches   | 13 (100)                                            | 13                                       |
|                  | Newton        | 3 (75)                                              | 4                                        |
|                  | Panola        | 2 (33)                                              | 6                                        |
|                  | Polk          | 10 (100)                                            | 10                                       |
|                  | Rusk          | 6 (46)                                              | 13                                       |
|                  | Sabine        | 3 (100)                                             | 3                                        |
|                  | San Augustine | 3 (100)                                             | 3                                        |
|                  | San Jacinto   | 4 (100)                                             | 4                                        |
|                  | Shelby        | 6 (100)                                             | 6                                        |
|                  | Trinity       | 5 (100)                                             | 5                                        |
|                  | Tyler         | 5 (100)                                             | 5                                        |
|                  | Walker        | 10 (100)                                            | 10                                       |

Abbreviations: RR, relative risk.

<sup>a</sup>Data was retrieved from the age-adjusted Poisson-based purely spatial scan statistic using the American Community survey 5-year estimate data (2014-2018) and primary cervical cancer incidence reported to Texas Cancer Registry from 2014-2018. Hot spots are clusters with significantly higher than expected proportion of cervical cancer incidence. Maximum spatial cluster size was set at 25 percent of the population at risk, using circular scan window and Replication 999.

<sup>b</sup>Additional cluster information: Cluster 1 – South Texas Plains/South Texas; Cluster 2 – Gulf Coast/Upper Gulf Coast; Cluster 3 – Prairies and Lakes/North Texas; Cluster 4 – Gulf Coast/Upper Gulf Coast; Cluster 5 – Panhandle Plains/West Texas; Cluster 6 – Prairies and Lakes/North Texas; Cluster 7 – Piney Woods/East Texas; Cluster 8 – Prairies and Lakes/North Texas; Cluster 9 – South Texas Plains/South Texas; Cluster 10 – Prairies and Lakes/North Texas; Cluster 11 – Prairies and Lakes/North Texas; Cluster 12 – Prairies and Lakes/North Texas; Cluster 13 – Prairies and Lakes/North Texas; and Cluster 14 – Prairies and Lakes/North Texas;
